# Supplementary material for: Dorsal vagal complex and hypothalamic glia differentially respond to leptin and energy balance dysregulation
Source: PubMed Central journal article supplement (PMC7062837; doi:10.1038/s41398-020-0767-0), 2020-03-09
Supplement: 41398_2020_767_MOESM2_ESM.pdf [file 41398_2020_767_MOESM2_ESM.pdf]

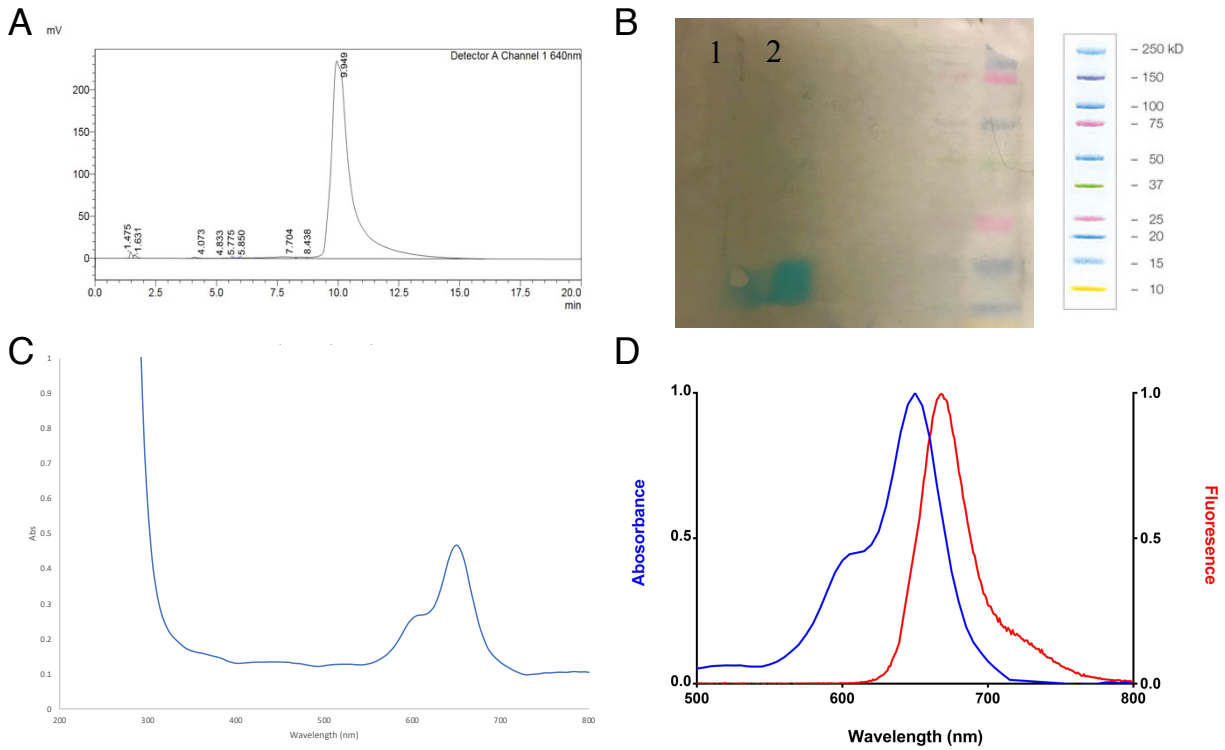

**Supplemental Figure 1: Synthesis of Cy5-labeled leptin (A)** RP-HPLC of Cy5-labeled leptin (Cy5-Lep) indicating  $\geq 98\%$  purity. **(B)** SDS-PAGE of Cy5-Lep (lanes 1 and 2) showing a 15–20 kDa product mass. **(C)** Electronic absorption spectrum of Cy5\_lep with observed maxima at 651 nm. **(D)** Excitation and emission spectra of Cy5-Lep at 651 nm and 669 nm, respectively.
