# Supplementary material for: Dorsal vagal complex and hypothalamic glia differentially respond to leptin and energy balance dysregulation
Source: PubMed Central journal article supplement (PMC7062837; doi:10.1038/s41398-020-0767-0), 2020-03-09
Supplement: 41398_2020_767_MOESM3_ESM.pdf [file 41398_2020_767_MOESM3_ESM.pdf]

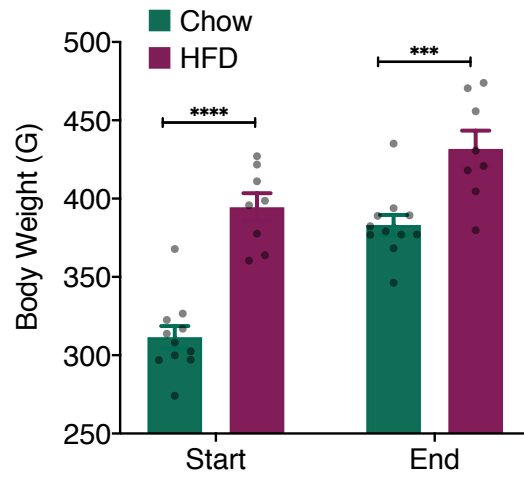

**Supplemental Figure 2: HFD-fed animals weighed significantly more than chow rats throughout behavioral experiments.** Experiment carried out in a counter-balanced, within-subject design. Body weights were compared at the start and end of experimental treatments. Data represented as mean  $\pm$  SEM, analyzed using unpaired t-test, \*\*\*\* $p < 0.0001$  vs Chow, \*\*\* $p < 0.001$  vs Chow; Chow  $n = 11$ , HFD  $n = 8$ .
