# Supplementary material for: Dorsal vagal complex and hypothalamic glia differentially respond to leptin and energy balance dysregulation
Source: PubMed Central journal article supplement (PMC7062837; doi:10.1038/s41398-020-0767-0), 2020-03-09
Supplement: 41398_2020_767_MOESM4_ESM.pdf [file 41398_2020_767_MOESM4_ESM.pdf]

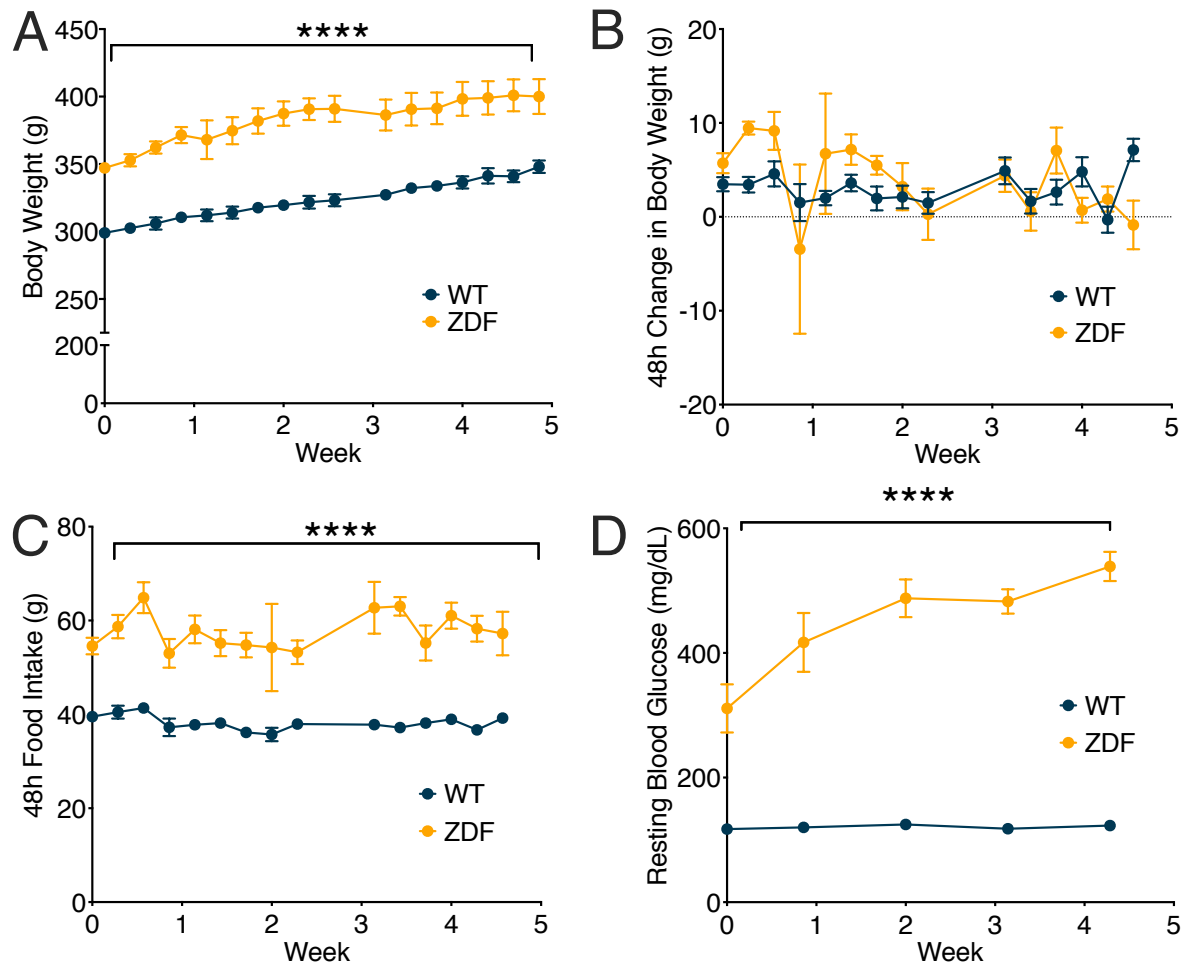

**Supplemental Figure 3: Metabolic characterization of Zucker diabetic fatty rat.** (A) Body weight and (C) food intake recorded every 48h. (B) No significant difference in 48h change in body weight between wt and ZDF. (D) Resting blood glucose levels recorded weekly. Data represented as Mean  $\pm$  SEM, analyzed using multiple t-test, \*\*\*\*p<0.0001 compared to wt; n=5/genotype.
